# Supplementary material for: SARS-CoV-2 infects and replicates in photoreceptor and retinal ganglion cells of human retinal organoids
Source: PubMed Central journal article supplement — Stem Cell Reports. 2022 Mar 24;17(4):789–803. doi: 10.1016/j.stemcr.2022.02.015 (PMC8943915; doi:10.1016/j.stemcr.2022.02.015), 2022-03-24
Supplement: mmc1.pdf [file mmc1.pdf]

**Stem Cell Reports, Volume 17**

**Supplemental Information**

**SARS-CoV-2 infects and replicates in photoreceptor and retinal ganglion cells of human retinal organoids**

**Yotam Menuchin-Lasowski, André Schreiber, Aarón Lecanda, Angeles Mecate-Zambrano, Linda Brunotte, Olympia E. Psathaki, Stephan Ludwig, Thomas Rauen, and Hans R. Schöler**

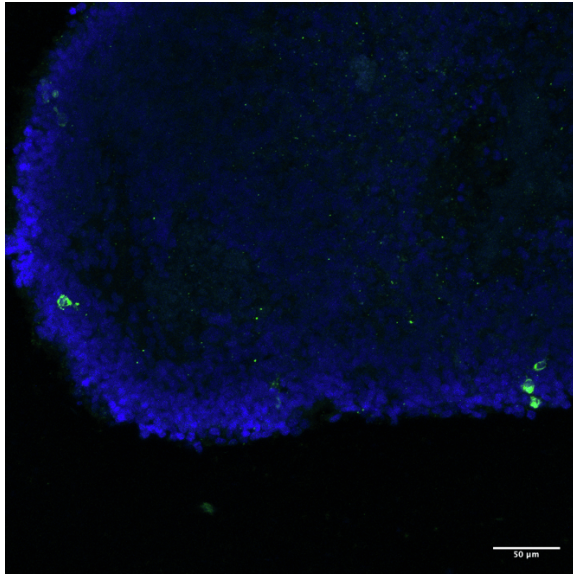

**Figure S1: Supplementary information for figure 1**

A retinal organoid derived from H9 embryonic stem cells stained with an anti-SARS-CoV-2 nucleocapsid (N) antibody (green). Scale bar = 50  $\mu$ M. (A). PCA analysis of the different infected on noninfected samples was performed using the rlog algorithm

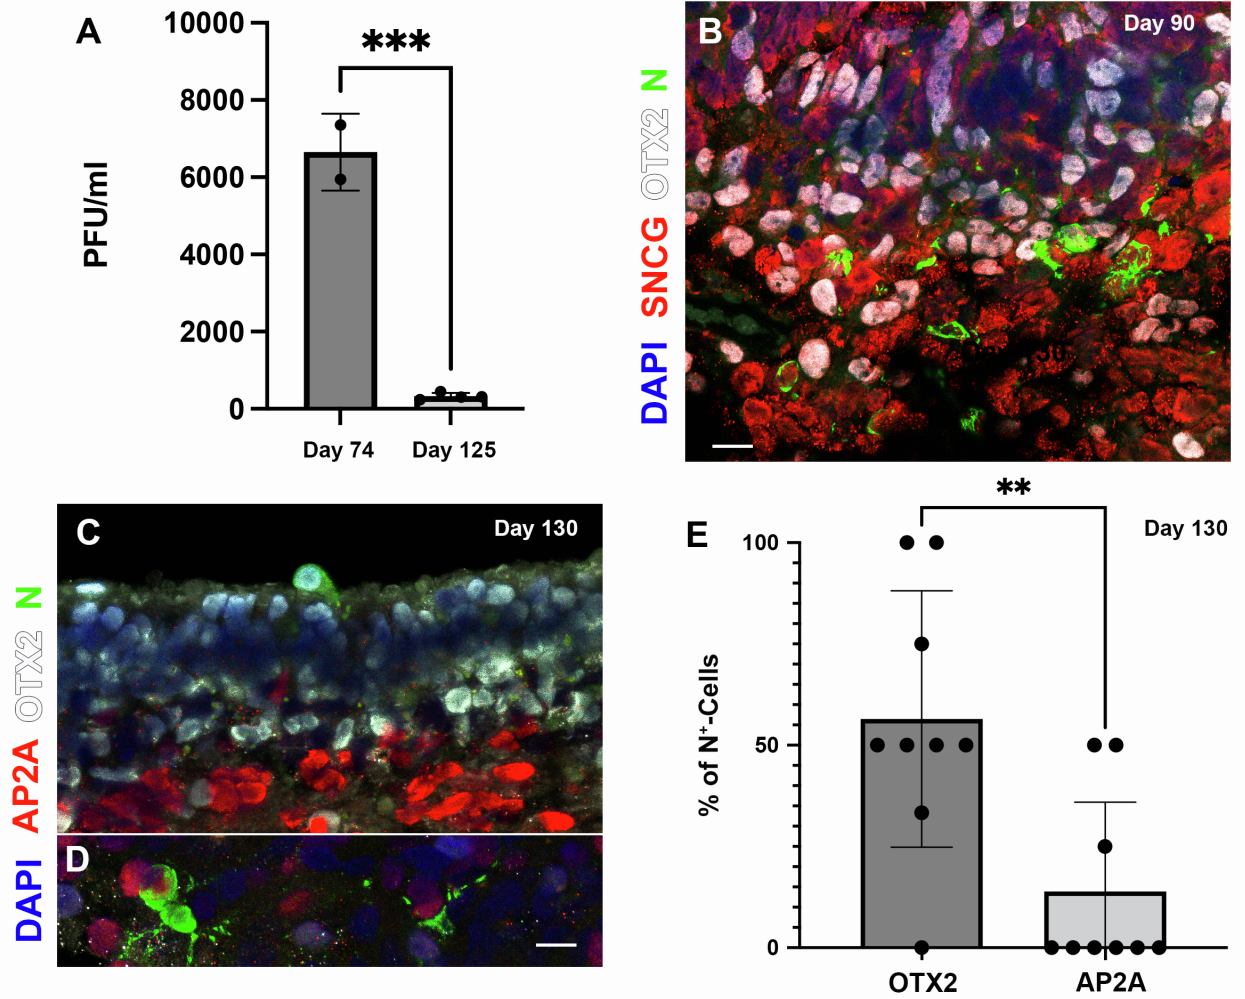

\*Scale Bar: B, C, D = 10 $\mu$ m,

### Figure S2: Supplementary information for figures 2 and 3

Retinal organoids infected with SARS-CoV-2 on day 90 (**B**) or day 130 (**C**) were stained with antibodies against SARS-CoV-2 nucleocapsid (N, green) and the retinal ganglion marker SNCG (white) (**B**), the photoreceptor and bipolar marker OTX2 (white) (**C**), the amacrine and horizontal marker AP2 $\alpha$  (red) (**C**). The percentage of cells co-stained with OTX2 or AP2A at day 130 was compared (**D**) AP2A<sup>+</sup> cells appeared only in a few of the organoids. N = 8 organoids taken from two different wells\*\*: P-value = 0.0044. Error bars represent standard deviation.

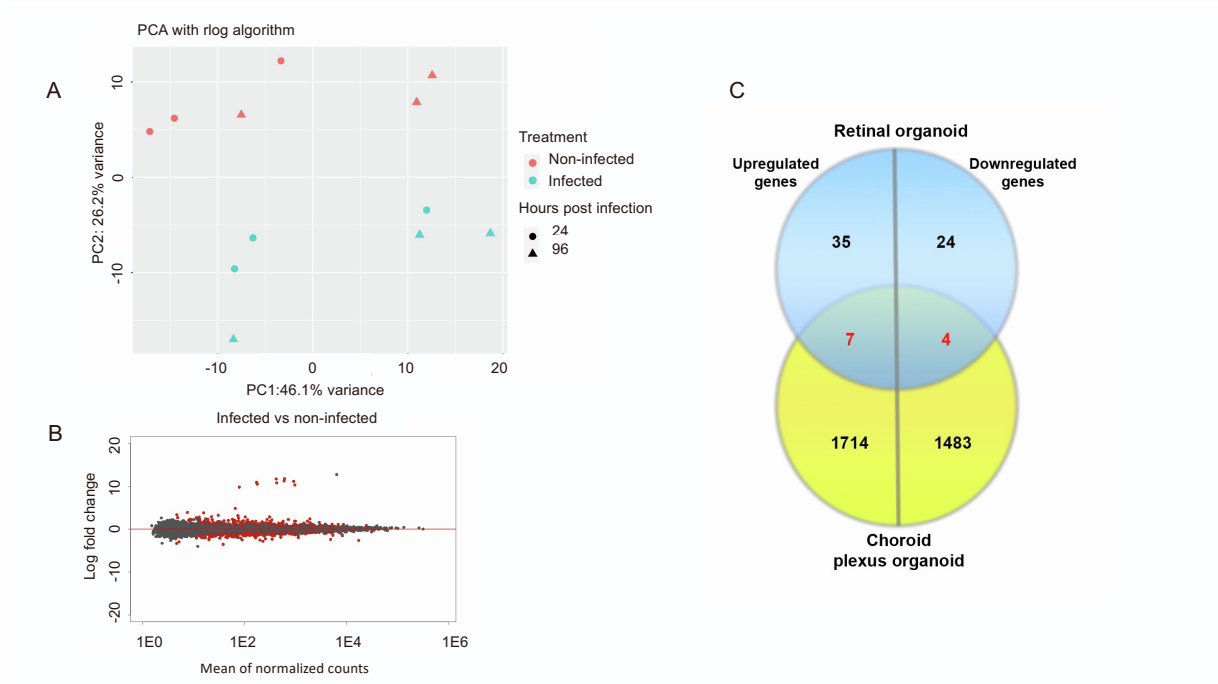

**Figure S3: Supplementary information for figure 4**

(A) MA plot representing the mean expression levels and the fold change of the different genes between the infected samples and the noninfected samples. Significantly differentially expressed genes (adjusted P-value  $\leq 0.05$ ) are colored red (B). Venn diagram comparing the differentially expressed genes found in retinal organoids 96 hours post-infection and the differentially expressed genes found in choroid plexus organoids after 72 hours. Only 7 genes are mutually upregulated and 4 genes are mutually downregulated (C).

| <b>Antibody</b>                             | <b>Source</b>   | <b>Cat. num</b> | <b>Dilution</b> |
|---------------------------------------------|-----------------|-----------------|-----------------|
| ACE 2                                       | Abcam           | ab1348          | 1:500           |
| AP2A                                        | Abcam           | ab220065        | 1:200           |
| CHX10 (VSX2)                                | Milipore        | ab9014          | 1:500           |
| CRALBP                                      | Abcam           | Ab15051         | 1:500           |
| HUC/D                                       | Invitrogen      | A21271          | 1:100           |
| Rabbit IgG<br>polyclonal isotype<br>control | Abcam           | Ab37415         | 1:500           |
| IL33                                        | Abcam           | Ab118503        | 1:200           |
| L/M Opsin                                   | Milipore        | AB5405          | 1:500           |
| OTX2                                        | R&D systems     | AF1979          | 1:500           |
| PAX6                                        | Biologend       | 901301          | 1:500           |
| RHODOPSIN                                   | Millipore       | MAB5316         | 1:500           |
| SARS-CoV/SARS-<br>CoV-2 nucleocapsid        | Sino biological | 40143-MM05      | 1:200           |
| SNCG                                        | Abcam           | Ab55424         | 1:500           |

**Table S1** – primary antibodies used for the study

| Target         | Forward                    | Reverse              |
|----------------|----------------------------|----------------------|
| GAPD<br>H      | TGATGACATCAAGAAGGTGGT<br>G | ACCCTGTTGCTGTAGCCAAT |
| SARS-<br>CoV-2 | CGCATAACAGTCTTRCAGGCT      | GTGTGATGTTGAWATGACAT |

**Table S2** – Primers used for the study
